# Supplementary material for: The Novelty of Human Cancer/Testis Antigen Encoding Genes in Evolution
Source: Int J Genomics. 2013 Apr 18;2013:105108. doi: 10.1155/2013/105108 (PMC3652184; doi:10.1155/2013/105108)
Supplement: Supplementary file 1 — Supplement materials can be found in Excel file. Data in this file divided into three sheets. The first contains information about gene families, gene common names, chromosomes positions and novelty of all Cancer testis genes that we were able to find in ENSEMBL database. Second is a list of CT gene names and their ENSEMBL id's. And third is a list of all CT genes that were presented in CT database but we were failed to find them in ENSEMBL database. [file 105108.f1.xls]

## Sheet: Characteristics of  CT genes
Gene family	Gene Symbol	Chromosome position	Taxon
MAGEC1	MAGEC1	Xq26	Catarrhini
SPANX	SPANXN4	Xq27.3	Bilateria
PAGE-5	PAGE5	Xp11.21	Catarrhini
PAGE-5	PAGE2B	Xp11.21	Catarrhini
XAGE	XAGE5	Xp11.22	Catarrhini
XAGE	XAGE2B/CTD-2267G17.3	Xp11.22	Catarrhini
XAGE	XAGE2	Xp11.22	Catarrhini
XAGE	XAGE3	Xp11.22-p11.21	Catarrhini
SSX	SSX5	Xp11.23	Catarrhini
PAGE-5	PAGE1	Xp11.23	Catarrhini
FTHL17	FTHL17	Xp21	Catarrhini
ZNF645	ZNF645	Xp22.11	Catarrhini
Cxorf61	Cxorf61	Xq23	Catarrhini
RHOXF2/PEPP2	PEPP2	Xq24	Catarrhini
HCA661	TFDP3	Xq26.2	Catarrhini
CT45	CT45A5	Xq26.3	Catarrhini
MAGEC2	MAGEC2	Xq27	Catarrhini
SPANX	SPANXN3	Xq27.3	Catarrhini
SPANX	SPANXN2	Xq27.3	Catarrhini
MAGEA	MAGEA9B/LOC728269	Xq28	Catarrhini
MAGEA	MAGEA9	Xq28	Catarrhini
MAGEA	MAGEA6	Xq28	Catarrhini
MAGEA	MAGEA3	Xq28	Catarrhini
MAGEA	MAGEA2B	Xq28	Catarrhini
MAGEA	MAGEA2	Xq28	Catarrhini
NY-ESO-1	CTAG1B	Xq28	Catarrhini
NY-ESO-1	CTAG1A	Xq28	Catarrhini
CSAGE	CSAG2	Xq28	Catarrhini
CSAGE	CSAG3B	Xq28	Catarrhini
PASD1	PASD1	Xq28	Catarrhini
SSX	SSX1	Xp11.23-p11.22	Euarchontoglires
MAGEB	MAGEB6	Xp21.3	Euarchontoglires
CPXCR1	CPXCR1	Xq21.3	Euarchontoglires
MAGEA	MAGEA1	Xq28	Euarchontoglires
FAM133A	FAM133A	Xq21.32	Eukaryota
ARX	ARX	Xp21	Euteleostomi
IL13RA	IL13RA2	Xq13.1-q28	Euteleostomi
FAM46D	FAM46D	Xq21.1	Euteleostomi
AKAP4	AKAP4	Xp11.2	Eutheria
SSX	SSX2b	Xp11.22	Eutheria
SSX	SSX2	Xp11.22	Eutheria
PAGE-5	PAGE4	Xp11.23	Eutheria
MAGEB	MAGEB1	Xp21.3	Eutheria
MAGEB	MAGEB5	Xp21.3	Eutheria
MAGEB	MAGEB4	Xp21.3	Eutheria
MAGEB	MAGEB3	Xp21.3	Eutheria
CAGE	DDX53	Xp22.11	Eutheria
NXF2	NXF2B	Xq22.1	Eutheria
NXF2	NXF2	Xq22.1	Eutheria
TAF7L	TAF7L	Xq22.1	Eutheria
CT47	CT47B1	Xq24	Eutheria
SAGE	SAGE1	Xq26	Eutheria
PLAC1	PLAC1	Xq26	Eutheria
CXorf48	CXorf48	Xq26.3	Eutheria
NY-SAR-35	FMR1NB	Xq27.3-q28	Eutheria
MAGEA	MAGEA11	Xq28	Eutheria
MAGEA	MAGEA10	Xq28	Eutheria
MAGEA	MAGEA4	Xq28	Eutheria
FATE	FATE1	Xq28	Eutheria
SPANX	SPANXN5	Xp11.22	Homininae
SSX	SSX4B	Xp11.23	Homininae
SSX	SSX4	Xp11.23	Homininae
HOM-TES-85	LUZP4	Xq23	Homininae
SPANX	SPANXD	Xq27.1	Homininae
SPANX	SPANXA1	Xq27.1	Homininae
SPANX	SPANXA2	Xq27.1	Homininae
SPANX	SPANXB1	Xq27.1	Homininae
SPANX	SPANXB2	Xq27.1	Homininae
SPANX	SPANXC	Xq27.1	Homininae
MAGEA	MAGEA12	Xq28	Homininae
MAGEA	MAGEA8	Xq28	Homininae
MAGEA	MAGEA5	Xq28	Homininae
XAGE	XAGE1A	Xp11.22	Homo sapiens
XAGE	XAGE1B	Xp11.22	Homo sapiens
XAGE	XAGE1C	Xp11.22	Homo sapiens
XAGE	XAGE1D	Xp11.22	Homo sapiens
XAGE	XAGE1E	Xp11.22	Homo sapiens
GAGE	GAGE12C	Xp11.23	Homo sapiens
GAGE	GAGE12D	Xp11.23	Homo sapiens
GAGE	GAGE12E	Xp11.23	Homo sapiens
GAGE	GAGE12F	Xp11.23	Homo sapiens
GAGE	GAGE12G	Xp11.23	Homo sapiens
GAGE	GAGE12H	Xp11.23	Homo sapiens
GAGE	GAGE13	Xp11.23	Homo sapiens
GAGE	GAGE12J	Xp11.23	Homo sapiens
GAGE	GAGE2A	Xp11.23	Homo sapiens
GAGE	GAGE1	Xp11.4-p11.2	Homo sapiens
GAGE	GAGE12I	Xp11.4-p11.2	Homo sapiens
MAGEB	MAGEB2	Xp21.3	Homo sapiens
CT47	CT47A10	Xq24	Homo sapiens
CT47	CT47A11	Xq24	Homo sapiens
CT47	CT47A9	Xq24	Homo sapiens
CT47	CT47A8	Xq24	Homo sapiens
CT47	CT47A7	Xq24	Homo sapiens
CT47	CT47A6	Xq24	Homo sapiens
CT47	CT47A5	Xq24	Homo sapiens
CT47	CT47A4	Xq24	Homo sapiens
CT47	CT47A3	Xq24	Homo sapiens
CT47	CT47A2	Xq24	Homo sapiens
CT47	CT47A1	Xq24	Homo sapiens
CT45	CT45A2	Xq26.3	Homo sapiens
CT45	CT45A3	Xq26.3	Homo sapiens
CT45	CT45A1	Xq26.3	Homo sapiens
CT45	CT45A6	Xq26.3	Homo sapiens
CT45	CT45A4	Xq26.3	Homo sapiens
TSPY1	TSPY1F	Yp11.2	Eutheria
TSPY1	TSPY1E	Yp11.2	Eutheria
TSPY1	TSPY1G	Yp11.2	Eutheria
TSPY1	TSPY1I	Yp11.2	Eutheria
TSPY1	TSPY1H	Yp11.2	Eutheria
TSPY1	TSPY1D	Yp11.2	Eutheria
TSPY1	TSPY2	Yp11.2	Eutheria
TSPY1	TSPY3	Yp11.2	Eutheria
SPAG6	SPAG6	10p12.2	Eukaryota
ARMC3	ARMC3	10p12.31	Opisthokonta
PTPN20A	PTPN20A	10q11.22	Eukaryota
CEP55	CEP55	10q23.33	Euteleostomi
TDRD1	TDRD1	10q25.3	Euteleostomi
SYCE1	SYCE1	10q26.3	Euteleostomi
ODF3	ODF3	11p15.5	Euteleostomi
LDHC	LDHC	11p15.5-p15.3	Eutheria
SPA17	SPA17	11q24.2	Eutheria
SPATA19	SPATA19	11q25	Eutheria
AKAP3	AKAP3	12p13.3	Eutheria
ACRBP	ACRBP	12p13.31	Eutheria
CEP290	CEP290	12q21.32	Euteleostomi
CCDC62	CCDC62	12q24.31	Euteleostomi
cylin A	cyclin A1	13q12.3-q13	Eukaryota
POTE	POTEG	14q11.1	Euarchontoglires
CTAGE-1	CTAGE5	14q13.3	Euteleostomi
POTE	POTEB	15q11.2	Homo sapiens
AF15q14	CASC5	15q14	Amniota
OIP5	OIP5	15q15.1	Amniota
KP-OVA52	C15orf60	15q22	Euteleostomi
CCDC33	CCDC33	15q24.1	Eutheria
OTOA	OTOA	16p12.2	Euteleostomi
PRM	PRM2	16p13.2	Euarchontoglires
PRSS54	PRSS54	16q21	Eutheria
FBXO39	FBXO39	17p13.1	Amniota
ODF4	ODF4	17p13.1	Eutheria
KIAA0100/MLAA-22	KIAA0100	17q11.2	Bilateria
SPACA3	SPACA3	17q11.2	Eutheria
HSPB9	HSPB9	17q21.2	Eutheria
SPAG9	SPAG9	17q21.33	Bilateria
TEX14	TEX14	17q22	Amniota
CTAGE-1	CTAGE1	18p11.2	Catarrhini
POTE	POTEC	18p11.21	Homininae
CABYR	CABYR	18q11.2	Eutheria
NOL4	NOL4	18q12	Euarchontoglires
CALR3	CALR3	19p13.11	Eutheria
TSSK6	TSSK6	19p13.11	Euteleostomi
THEG	THEG	19pter-p13	Eutheria
TULP2	TULP2	19q13.1	Eutheria
TEX101	TEX101	19q13.31	Eutheria
SGY-1	DKKL1	19q13.33	Eutheria
COX6B2	COX6B2	19q13.42	Eutheria
NLRP4	NLRP4	19q13.42	Euarchontoglires
SPAG17	SPAG17	1p12	Euteleostomi
SYCP1	SYCP1	1p13-p12	Euteleostomi
BRDT	BRDT	1p22.1	Amniota
KIF2C	MCAK	1p34.1	Amniota
ACTL8	ACTL8	1p36.2-p35	Eutheria
HORMAD1	HORMAD1	1q21.2	Eukaryota
NUF2/CDCA1	CDCA1	1q23.3	Opisthokonta
MAEL	MAEL	1q24.1	Amniota
ANKRD45	ANKRD45	1q25.1	Euteleostomi
LEMD1	LEMD1	1q32.1	Eutheria
GPATCH2	GPATCH2	1q41	Euteleostomi
SPAG4	SPAG4	20q11.21	Eutheria
SEMG1	SEMG1	20q12-q13.2	Catarrhini
SPINLW1	SPINLW1	20q12-q13.2	Euarchontoglires
SPO11	SPO11	20q13.2-q13.3	Eukaryota
BORIS	CTCFL	20q13.31	Eutheria
TPTE	TPTE	21p11	Eukaryota
LIPI	LIPI	21q11.2	Coelomata
POTE	POTED	21q11.2	Catarrhini
POTE	POTEH	22q11.1	Euarchontoglires
PRAME	PRAME	22q11.22	Eutheria
CTNNA2	CTNNA2	2p12-p11.1	Bilateria
GPAT2	GPAT2	2q11.1	Euteleostomi
TSGA10	TSGA10	2q11.2	Euteleostomi
POTE	POTEE	2q21.1	Euarchontoglires
LYPD6B	LOC130576	2q23.1-q23.2	Euteleostomi
TMEFF	TMEFF2	2q32.3	Euteleostomi
RQCD1	RQCD1	2q35	Eukaryota
CCDC36	CCDC36	3p21.31	Eutheria
MORC	MORC1	3q13	Eutheria
DPPA2	DPPA2	3q13.13	Eutheria
IGSF11	IGSF11	3q13.32	Euteleostomi
TMEM108	TMEM108	3q21	Euteleostomi
ROPN1	ROPN1	3q21.1	Eutheria
RBM46	RBM46	4q32.1	Euteleostomi
ADAM29	ADAM29	4q34	Eutheria
CCDC110	CCDC110	4q35.1	Eutheria
SPEF2	SPEF2	5p13.2	Euteleostomi
SLCO6A1	SLCO6A1	5q21.1	Eutheria
TDRD1	TDRD6	6p12.3	Euteleostomi
TPX1	CRISP2	6p21-qter	Coelomata
ZNF165	ZNF165	6p21.3	Eutheria
CAGE1	CAGE1	6p24.3	Eutheria
HAGE	DDX43	6q12-q13	Bilateria
CT96	TTK	6q13-q21	Euteleostomi
ELOVL4	ELOVL4	6q14	Coelomata
IMP-3	IMP-3	7p11	Eukaryota
POTE	POTEA	8p11.1	Homininae
ADAM2	ADAM2	8p11.2	Eutheria
TEX15	TEX15	8p12	Eutheria
PBK	PBK	8p21.2	Coelomata
PIWIL2	PIWIL2	8p21.3	Euteleostomi
RGS22	RGS22	8q22.2	Eutheria
SPAG1	SPAG1	8q22.2	Coelomata
ODF1	ODF1	8q22.3	Euteleostomi
ATAD2	ATAD2	8q24.13	Bilateria
LY6K	LY6K	8q24.3	Eutheria
DCAF12	DCAF12	9p13.3	Coelomata
SPAG8	SPAG8	9p13.3	Eutheria
TMEFF	TMEFF1	9q31	Eutheria
ODF2	ODF2	9q34.11	Eutheria

## Sheet: Ensembl ID for CT genes
Associated Gene Name	Ensembl Gene ID
AKAP4	ENSG00000147081
ARX	ENSG00000004848
CPXCR1	ENSG00000147183
CT45A1	ENSG00000232478
CT45A2	ENSG00000242185
CT45A4	ENSG00000228836
CT45A6	ENSG00000226907
CT47A1	ENSG00000236371
CT47A10	ENSG00000224089
CT47A11	ENSG00000226929
CT47A12	ENSG00000226685
CT47A2	ENSG00000242362
CT47A3	ENSG00000236126
CT47A4	ENSG00000230594
CT47A5	ENSG00000237957
CT47A6	ENSG00000226023
CT47A7	ENSG00000228517
CT47A8	ENSG00000230347
CT47A9	ENSG00000226600
CT47B1	ENSG00000236446
CTAG1	ENSG00000183678
CTAG1B	ENSG00000184033
CTAG2	ENSG00000126890
CXorf48	ENSG00000169551
DDX5	ENSG00000184735
FATE1	ENSG00000147378
FMR1NB	ENSG00000176988
FTHL17	ENSG00000132446
GAGE1	ENSG00000205777
GAGE10	ENSG00000215274
GAGE12C	ENSG00000237671
GAGE12D	ENSG00000227488
GAGE12E	ENSG00000216649
GAGE12F	ENSG00000236362
GAGE12G	ENSG00000215269
GAGE12H	ENSG00000224902
GAGE12I	ENSG00000241465
GAGE12J	ENSG00000224659
GAGE13	ENSG00000237597
GAGE2A	ENSG00000189064
GAGE4	ENSG00000255738
IL13RA2	ENSG00000123496
LUZP4	ENSG00000102021
MAGEA1	ENSG00000198681
MAGEA10	ENSG00000124260
MAGEA11	ENSG00000185247
MAGEA12	ENSG00000213401
MAGEA2	ENSG00000184750
MAGEA2B	ENSG00000183305
MAGEA3	ENSG00000221867
MAGEA4	ENSG00000147381
MAGEA6	ENSG00000197172
MAGEA8	ENSG00000156009
MAGEA9	ENSG00000166008
MAGEA9B	ENSG00000123584
MAGEB1	ENSG00000214107
MAGEB10	ENSG00000177689
MAGEB16	ENSG00000189023
MAGEB17	ENSG00000182798
MAGEB18	ENSG00000176774
MAGEB2	ENSG00000099399
MAGEB3	ENSG00000198798
MAGEB4	ENSG00000120289
MAGEB5	ENSG00000188408
MAGEB6	ENSG00000176746
MAGEC1	ENSG00000155495
MAGEC2	ENSG00000046774
NXF2	ENSG00000185554
NXF2B	ENSG00000185945
PAGE1	ENSG00000068985
PAGE2	ENSG00000234068
PAGE2B	ENSG00000238269
PAGE4	ENSG00000101951
PAGE5	ENSG00000158639
PASD	ENSG00000166049
PLAC1	ENSG00000170965
SAGE1	ENSG00000181433
SPANXA2	ENSG00000203926
SPANXB1	ENSG00000235604
SPANXB2	ENSG00000227234
SPANXC	ENSG00000198573
SPANXD	ENSG00000196406
SPANXN1	ENSG00000203923
SPANXN3	ENSG00000189252
SPANXN4	ENSG00000189326
SPANXN5	ENSG00000204363
SSX	ENSG00000241476
SSX1	ENSG00000126752
SSX2B	ENSG00000157950
SSX3	ENSG00000165584
SSX4B	ENSG00000198946
SSX4B	ENSG00000198946
SSX5	ENSG00000165583
TAF7L	ENSG00000102387
XAGE1A	ENSG00000204379
XAGE1B	ENSG00000204382
XAGE1C	ENSG00000183461
XAGE1D	ENSG00000204376
XAGE1E	ENSG00000204375
XAGE2	ENSG00000185751
XAGE2B	ENSG00000155622
XAGE3	ENSG00000171402
XAGE5	ENSG00000171405
PRAMEF1	ENSG00000116721
POTEE	ENSG00000188219
BAGE4	ENSG00000256715
PRAMEF11	ENSG00000204513
NLRP4	ENSG00000160505
LY6K	ENSG00000160886
POTEG	ENSG00000187537
POTEG	ENSG00000222036
CABYR	ENSG00000154040
ZNF165	ENSG00000197279
POTED	ENSG00000166351
SYCE1L	ENSG00000205078
DPPA2	ENSG00000163530
LIPI	ENSG00000188992
SPACA3	ENSG00000141316
TPTE	ENSG00000166157
ADAM2	ENSG00000104755
PRSS54	ENSG00000103023
THEG4	ENSG00000186118
CRISP2	ENSG00000096006
SPINLW1	ENSG00000101448
SPINLW1	ENSG00000249139
ACTL8	ENSG00000117148
ODF4	ENSG00000184650
CASC5	ENSG00000137812
ADAM29	ENSG00000168594
PRM2	ENSG00000122304
LEMD1	ENSG00000186007
ADAM20	ENSG00000134007
TEX101	ENSG00000131126
SLCO6A1	ENSG00000205359
CCDC36	ENSG00000173421
SPATA19	ENSG00000166118
CAGE1	ENSG00000164304
COX6B2	ENSG00000160471
HSPB9	ENSG00000197723
CTCFL	ENSG00000124092
ROPN1B	ENSG00000114547
TEX15	ENSG00000133863
ODF3L2	ENSG00000181781
CCDC33	ENSG00000140481
THEG	ENSG00000105549
ODF3L1	ENSG00000182950
TULP2	ENSG00000104804
SYCE1	ENSG00000171772
DKKL1	ENSG00000104901
SPA17	ENSG00000064199
MORC1	ENSG00000114487
OIP5	ENSG00000104147
SPEF2	ENSG00000152582
ADAM21	ENSG00000139985
CCDC110	ENSG00000168491
CTNNA2	ENSG00000066032
AKAP3	ENSG00000111254
ODF2L	ENSG00000122417
SPAG4L	ENSG00000167098
PTPN20A	ENSG00000183675
PTPN20A	ENSG00000204179
CCDC62	ENSG00000130783
TEX14	ENSG00000121101
TPTE2	ENSG00000132958
DDX43	ENSG00000080007
ROPN1	ENSG00000065371
ACRBP	ENSG00000111644
TDRD6	ENSG00000180113
TMEM108	ENSG00000144868
OTOA	ENSG00000155719
GPAT2	ENSG00000186281
ANKRD45	ENSG00000183831
BRDT	ENSG00000137948
SPAG4	ENSG00000061656
MPHOSPH1	ENSG00000138182
ADAM28	ENSG00000042980
PIWIL2	ENSG00000197181
ADAM22	ENSG00000008277
ODF1	ENSG00000155087
LDHC	ENSG00000166796
CRISP2	ENSG00000124490
SYCP1	ENSG00000198765
TTK	ENSG00000112742
MAEL	ENSG00000143194
CEP55	ENSG00000138180
NOL4	ENSG00000101746
TSSK6	ENSG00000178093
CALR3	ENSG00000141979
CTAGE5	ENSG00000150527
ROPN1L	ENSG00000145491
GPATCH2	ENSG00000092978
ARMC3	ENSG00000165309
HORMAD1	ENSG00000143452
ODF3	ENSG00000177947
DCAF12	ENSG00000198876
ODF2	ENSG00000136811
MPHOSPH10	ENSG00000124383
ATAD2B	ENSG00000119778
SPO11	ENSG00000054796
ATAD2	ENSG00000156802
TMEFF2	ENSG00000144339
TSGA10	ENSG00000135951
CEP290	ENSG00000198707
TMEFF1	ENSG00000241697
PBK	ENSG00000168078
IGSF11	ENSG00000144847
SPAG9	ENSG00000008294
RBM46	ENSG00000151962
ADAM23	ENSG00000114948
KIAA0100	ENSG00000007202
ELOVL4	ENSG00000118402
IMP3	ENSG00000177971
RQCD1	ENSG00000144580

## Sheet: CT genes not in Homologene
Gene family	Gene Symbol	Chromosome position
PAGE-5	CT16.2	X911.21
SSX	SSX6	Xp11.2
XAGE	XAGE-4/RP11-167P23.2	Xp11.21
PAGE-5	PAGE3	Xp11.21
PAGE-5	PAGE2	Xp11.21
XAGE	XAGE-3b	Xp11.22
GAGE	GAGE12B	Xp11.23
GAGE	GAGE8	Xp11.23
GAGE	GAGE3	Xp11.23
SSX	SSX9	Xp11.23
SSX	SSX7	Xp11.23
SSX	SSX3	Xp11.23
GAGE	GAGE4	Xp11.4-p11.2
GAGE	GAGE5	Xp11.4-p11.2
GAGE	GAGE6	Xp11.4-p11.2
GAGE	GAGE7	Xp11.4-p11.2
NA88A pseudogene	VENTXP1	Xp21.3
SPANX	SPANXN1	Xq27
MAGEC1	MAGEC3	Xq27.2
SPANX	SPANXE	Xq27.2
NY-ESO-1	CTAG2	Xq28
NY-ESO-1	LAGE-1b	Xq28
CSAGE	CSAG1	Xq28
MPHOSPH1	MPHOSPH1	10q23.31
TDRD	TDRD4	13q12.12
LOC348120	LOC348120	15q11.2
GOLGAGL2 FA	GOLGAGL2 FA	15q11.2
LOC196993	LOC196993	15q23
PRM	PRM1	16p13.2
CTAGE-1	CTAGE-2	18p11.2
JARID1B	JARID1B	1q32.1
BAGE	BAGE5	21p11.1
BAGE	BAGE4	21p11.1
BAGE	BAGE3	21p11.1
BAGE	BAGE	21p11.1
BAGE	BAGE2	21p11.1
C21orf99	C21orf99	21q11.2
MMA1	DSCR8	21q22.2
MMA1	MMA1b	21q22.2
LOC440934	LOC440934	2q36.1
TSP50	TSP50	3p14-p12
LOC647107	LOC647107	3q26.1
TAG	TAG	5p15.2
CT69	CT69/BC040308	6q23.2
CT66	CT66/AA884595	7q11.22
CT70	CT70/BI818097	Unknown
TSPY1	LOC728137	Yp11.2
